# Supplementary material for: Predictors of Fighting Ability Inferences Based on Faces
Source: Front Psychol. 2019 Jan 15;9:2740. doi: 10.3389/fpsyg.2018.02740 (PMC6341000; doi:10.3389/fpsyg.2018.02740)
Supplement: Table S1 — Factor analysis; Exploratory correlation matrix. [file Table_1.XLSX]

## Sheet: S1_Factor analysis
Component	Item	Loading
Strength	Arm Extension (mean)	0.844488
	Arm Flexion (mean)	0.828388
	Trunk Forward	0.827319
	Trunk Bend	0.742649
	Neck Bend	0.725928
	Knee Flexion (mean)	0.682098
	Knee Extension (mean)	0.672893
	Neck Forward	0.656523
	Handgrip Strength (mean)	0.466755
Lung Capacity	Forced Expiratory Volume	0.940629
	Forced Vital Capacity	0.899291
	Peak Expiratory Flow	0.519149
Anaerobic Capacity	Maximum Anaerobic Performance	0.901446
	Minimum Anaerobic Performance	0.853155
	Number of Rotations	0.794014
Table S1 Results of three separate PCAs on the measured performance variables.

## Sheet: S2_ Exploratory correlation
Correlations
	Mean Fighting Ability Rating	Score (wins/fights ratios)	Age	Height	Body Weight	Body Fat	Muscle Mass	Bone Mass	Total Body Water	Hangrip Strength (mean)	Arm Flexion (mean)	Arm Extension (mean)	Trunk Bend	Trunk Forward	Neck Forward	Neck Bend	Knee Flexion (mean)	Knee Extension (mean)	Forced Vital Capacity	Forced Expiratory Volume	Peak Expiratory Flow	Maximum Anaerobic Performance	Minimum Anaerobic Performance	Average Anaerobic Performance	Anaerobic Capacity	Decrease of Performance	Number of Rotations	Dynamometry Component	Spirometry Component	Wingate Component
Mean Fighting Ability Rating		-0.109167	,347*	0.0365575	,345*	0.278016	,328*	,311*	,356*	,347*	0.0754997	0.10831	0.0761669	-0.0504157	,310*	0.274928	-0.174137	0.0407827	-0.0139973	0.130201	0.159344	,460**	,326*	,476**	,475**	,370*	0.269516	0.0954085	0.0981176	,418**
Score (wins/fights ratios)			-0.0260559	,342*	0.232829	0.133975	0.251609	0.244133	0.197307	-0.106059	0.17569	0.0797165	0.186866	0.245883	0.0762522	0.157411	0.132491	0.00548387	0.231939	0.125367	-0.102674	-0.0242983	0.11496	0.0324162	0.0360837	-0.124392	-0.186559	0.0699456	0.139174	-0.0331448
Age				0.118752	,305*	0.281797	0.269709	0.270204	0.279171	0.271653	0.254743	0.133272	,395**	0.215025	,306*	,341*	0.120844	0.22008	-0.226528	-0.199543	0.255884	,444**	,491**	,493**	,492**	0.27694	,332*	0.28709	-0.13172	,498**
Height					,605***	0.207367	,734***	,739***	,637***	0.26496	,361*	0.285701	0.287591	,339*	,353*	0.18712	,563***	0.0533335	,511***	,575***	0.126133	0.227027	,347*	0.260532	0.262459	0.0723601	-0.294099	,381*	,543***	0.123049
Body Weight						,817***	,946***	,938***	,957***	,480**	,584***	,587***	,676***	,571***	,575***	,493**	,356*	0.27077	,400**	,393**	0.142669	,671***	,663***	,699***	,701***	,462**	-0.108549	,615***	,409**	,499**
Body Fat							,585***	,572***	,633***	,361*	,414**	,467**	,635***	,407**	,424**	,366*	0.0790845	,321*	0.2377	0.144398	0.0786231	,632***	,554***	,635***	,636***	,490**	0.00433889	,478**	0.198879	,482**
Muscle Mass								,997***	,989***	,471**	,587***	,561***	,593***	,572***	,570***	,485**	,455**	0.19717	,429**	,473**	0.157103	,589***	,620***	,626***	,628***	,375*	-0.15327	,594***	,465**	,432**
Bone Mass									,984***	,465**	,593***	,566***	,587***	,582***	,576***	,499**	,467**	0.214762	,432**	,470**	0.153742	,575***	,619***	,614***	,616***	,359*	-0.164139	,597***	,464**	,422**
Total Body Water										,495**	,603***	,592***	,628***	,597***	,579***	,493**	,414**	0.210167	,384*	,419**	0.142508	,612***	,626***	,647***	,649***	,403**	-0.136438	,613***	,414**	,450**
Hangrip Strength (mean)											0.292837	,437**	,500**	0.241793	0.16402	0.0308951	,322*	,308*	0.232033	0.237154	0.197006	,501**	,402**	,456**	,454**	,414**	0.125975	,753***	0.272037	,412**
Arm Flexion (mean)												,786***	,551***	,593***	,479**	,548***	,524***	,475**	0.211415	0.199632	0.270406	,485**	,524***	,531***	,533***	,307*	0.0866001	,702***	0.264023	,439**
Arm Extension (mean)													,522***	,577***	,478**	,511***	,504***	,594***	0.20813	0.112753	0.0709031	,424**	,501**	,463**	,463**	0.250673	0.00596019	,785***	0.168127	,375*
Trunk Bend														,646***	,383*	,374*	,414**	,444**	0.167541	0.00819698	0.244482	,576***	,599***	,597***	,598***	,389**	0.12007	,764***	0.145337	,518***
Trunk Forward															,621***	,642***	,577***	,367*	0.295851	0.205701	0.199219	,301*	,493**	,384*	,386**	0.0807733	-0.0756253	,595***	0.286787	0.291269
Neck Forward																,648***	0.261441	0.185141	,306*	0.267332	,429**	,545***	,581***	,596***	,597***	,343*	0.192922	,301*	,382*	,525***
Neck Bend																	,331*	,516***	0.208735	0.193113	,330*	,444**	,503***	,505***	,506***	0.270239	0.146327	,358*	0.275474	,436**
Knee Flexion (mean)																		,501**	0.2661	0.262057	0.144127	0.186693	0.278803	0.20061	0.199769	0.0817821	-0.0997364	,703***	0.285592	0.150609
Knee Extension (mean)																			0.0257699	-0.108056	0.176136	,324*	,309*	,331*	,328*	0.2267	0.150817	,695***	0.00660941	,311*
Forced Vital Capacity																				,811***	0.199525	0.267622	0.112346	0.218334	0.221441	0.287541	-0.115875	0.232545	,899***	0.112895
Forced Expiratory Volume																					,341*	0.25856	0.0876225	0.191886	0.194196	0.286156	-0.158431	0.14551	,941***	0.0838519
Peak Expiratory Flow																						,432**	0.193368	,351*	,349*	,449**	,319*	0.197303	,519***	,372*
Maximum Anaerobic Performance																							,693***	,949***	,948***	,901***	,585***	,518***	,361*	,901***
Minimum Anaerobic Performance																								,848***	,847***	,332*	,472**	,527***	0.144592	,853***
Average Anaerobic Performance																									1,000***	,730***	,631***	,520***	0.284875	,958***
Anaerobic Capacity																										,729***	,629***	,519***	0.2869	,957***
Decrease of Performance																											,501**	,357*	,388**	,688***
Number of Rotations																												0.0652027	-0.0445257	,794***
Dynamometry Component																													0.228437	,446**
Spirometry Component																														0.190304
Wingate Component
Table S2 Exploratory correlation matrix. Values represent Pearson's correlation coefficients r; * p < 0.05, ** p < 0.01, *** p < 0.001.
