# Supplementary material for: Predictors of Fighting Ability Inferences Based on Faces
Source: Front Psychol. 2019 Jan 15;9:2740. doi: 10.3389/fpsyg.2018.02740 (PMC6341000; doi:10.3389/fpsyg.2018.02740)
Supplement: Table S3 — Dataset for Athletes measurements. [file Table_3.xlsx]

## Sheet: List1
ID	Mean_formidability_rating	Age	Height	Beardedness	Body Composition_Weight_kg	Body Composition_Fat_kg	Body Composition_Muscle_kg	Body Composition_Bone_kg	Body Composition_Total Body Water	Dynamometry_Handgrip_dx	Dynamometry_Handgrip_sin	Dynamometry_Handgrip_mean	Dynamometry_Arm_flexion_dx	Dynamometry_Arm_flexion_sin	Dynamometry_Arm_flexion_mean	Dynamometry_Arm_extension_dx	Dynamometry_Arm_extension_sin	Dynamometry_Arm_extension_mean	Dynamometry_Trunk_bend	Dynamometry_Trunk_forward	Dynamometry_Neck_forward	Dynamometry_Neck_bend	Dynamometry_Knee_flexion_dx	Dynamometry_Knee_flexion_sin	Dynamometry_Knee_flexion_mean	Dynamometry_Knee_extension_dx	Dynamometry_Knee_extension_sin	Dynamometry_Knee_extension_mean	Score_wins to fights ratio	Spirometry_Forced Vital Capacity	Spirometry_Forced Expiratory Volume	Spirometry_Peak Expiratory Flow	Wingate test_Maximal Performance	Wingate test_Minimal Performance	Wingate test_Average Performance	Wingate test_Anaerobic capacity	Wingate test_Performance Decrease	Wingate test_Speed	PCA_Dynamometry component	PCA_Spirometry component	PCA_Wingate component
F1	5.3	34	172.3	1	81.1	7.2	70.3	3.6	55	54.2	57.4	55.8	36	34.7	35.35	29.7	32.6	31.15	108.5	84.3	22.8	46.5	30	28.9	29.45	88.2	68.6	78.4	0.75	5.22	4.46	8.93	810.6	346.8	588.4	17.7	463.8	54	0.40546	-0.24917	0.853
F2	5.72	37	187	2	93.1	15.1	74.2	3.8	56.3	54.9	51.7	53.3	40.4	34.5	37.45	33.2	33.3	33.25	103.8	72.6	24.5	48.9	34	33	33.5	107.3	95.5	101.4	0.89	5.1	4.52	10.62	777.7	438.4	600.8	18	339.2	48.2	0.68551	0.00455	1.00216
F3	2.73	20	180.7	2	73.5	7.6	62.9	3.3	47	44.5	48.8	46.65	28.1	30.4	29.25	20.6	21	20.8	85.3	61.8	18.9	33.2	32	29.8	30.9	49	51	50	0.44	5.67	4.69	8.06	583.5	339.9	492.8	14.8	243.5	50	-1.03241	0.08334	-0.16742
F4	3.56	22	190.4	2	86.7	4.9	77.8	4	59	49	50.9	49.95	35.2	32.6	33.9	28.5	27.4	27.95	91.4	88.3	24.1	36.1	32.5	32.1	32.3	46.2	46.8	46.5	1	5.2	4.64	8.06	644.5	377.6	509.1	15.3	266.9	43.9	-0.50994	-0.25387	-0.10522
F5	3.55	33	192.3	1	85.7	4.5	77.2	4	58	54.7	57	55.85	46	45	45.5	30.5	30.2	30.35	122.8	105.3	26.3	49.9	57.4	53.3	55.35	97.3	88.3	92.8	1	6.22	5.22	12.52	679.3	381.9	539.3	16.2	297.3	47	1.68234	1.60966	0.23088
F6	5.05	38	182.7	1	94.8	13	77.8	4	60.3	55.3	50.2	52.75	25.8	20.5	23.15	17.3	10.2	13.75	116.2	99.4	32.3	46.9	20.6	19.9	20.25	39.7	39.6	39.65	1	5.02	4.66	11.67	719.3	431.2	563.1	16.9	288.1	44.4	-1.44994	0.24512	0.52718
F7	2.33	25	173.7	1	71.9	4.7	63.9	3.3	49	43.4	46.1	44.75	36.4	34.4	35.4	26	27.4	26.7	101.5	86.1	22.1	32.1	28.6	28.5	28.55	61.5	57.7	59.6	1	5.09	3.58	8.68	580.2	342	478.8	14.4	238.2	49.6	-0.48062	-1.11178	-0.18901
F8	2.87	21	188.1	1	75.8	3.1	69.1	3.6	52.4	54.3	51	52.65	34.3	28.9	31.6	24.9	23.8	24.35	53.7	87.4	20.3	34.6	41.8	37.6	39.7	63.8	58.2	61	0.75	6.21	5.66	9.49	422	203.9	293.1	8.8	218.1	29	-0.51401	1.47366	-2.93377
F9	4.12	24	167.5	2	65.5	4.6	57.9	3	44.4	57.7	51.1	54.4	34.5	30.9	32.7	24	26.1	25.05	85.2	66.1	15.2	36.3	20	22.6	21.3	72.3	61.6	66.95	0.6	4.1	4.07	9.77	431.9	293.7	361.8	10.9	138.2	41.3	-0.40878	-1.14192	-1.51316
F10	6	37	177.1	3	78.6	7.1	68	3.5	51.9	57.6	53	55.3	32	32.6	32.3	28.2	26.9	27.55	78.2	73.9	22	44.2	30.7	29.4	30.05	61.4	55.5	58.45	0.67	4.03	3.85	7.79	671.8	377	534.4	16	294.8	50.6	-0.46382	-1.69728	0.4022
F11	3.33	18	188.1	1	78.5	5.7	69.2	3.6	51.4	47	55	51	31.8	34	32.9	25	28.4	26.7	95.6	81.5	21.1	37.1	29.3	26	27.65	55.9	54.9	55.4	0.88	6.68	5.18	8.44	485.8	331.3	392.5	11.8	154.5	37.4	-0.44599	1.19222	-1.33461
F12	3.1	28	177.8	2	70.6	4.2	63.1	3.3	47.4	54	55.3	54.65	34.7	33	33.85	31.7	34.1	32.9	86.1	70.1	25.2	37.6	26.1	24.4	25.25	89.3	73.1	81.2	0.8	5.23	3.95	9.37	598	394.7	500.3	15	203.3	52.8	0.03992	-0.59906	0.42784
F13	4.52	23	184.1	1	84.4	4.7	75.8	3.9	58.6	58.7	60.4	59.55	30.7	31.2	30.95	37.1	36.5	36.8	87.1	82.2	29.9	39.4	33.4	34.9	34.15	59.1	58.7	58.9	0.88	5	4.4	7.7	471.1	368.9	416.8	12.5	102.2	36.9	0.22322	-0.64058	-1.15789
F14	3.55	21	193.8	3	96.2	10	82	4.2	62.4	58.7	58.2	58.45	38.3	36.7	37.5	29	27.1	28.05	88.7	77.6	21	35	36.2	35.9	36.05	59.5	51.4	55.45	0.82	5.71	5.48	6.89	626.5	420	522.9	15.7	206.5	40.6	0.23779	0.57964	-0.08399
F15	4.09	27	172.6	3	73.6	6	64.3	3.3	49.5	62.3	60.1	61.2	23.6	22.7	23.15	23.1	21.3	22.2	72.9	59.4	18.3	34.8	21.9	19.9	20.9	58.5	58.8	58.65	0.67	5.62	4.59	8.61	619.9	315.7	474.1	14.2	304.2	48	-0.70677	0.05856	-0.34302
F16	4.19	19	176.7	2	80.1	4.6	71.8	3.7	55.6	56.3	55.5	55.9	35.4	33.6	34.5	25.8	26.8	26.3	100.3	74.4	20.3	41.7	31.3	31.1	31.2	71.3	80.7	76	0.6	5.48	4.73	10.42	784.1	342.8	559.9	16.8	441.3	52.1	0.21697	0.38676	0.62136
F17	4.98	21	175.4	2	76.2	4.3	68.4	3.5	53.8	51.4	44.5	47.95	23.4	27.4	25.4	23.6	24.6	24.1	82	70.4	21.9	36.6	26.1	26.9	26.5	54.3	54.7	54.5	0	4.49	4.46	7.71	641.3	346.9	499.5	15	294.4	48.9	-1.10709	-0.9088	-0.00648
F18	4.22	28	165	3	60.6	2.7	55	2.9	43.2	58.1	51.4	54.75	22.5	22.3	22.4	24.1	23.1	23.6	85.8	78.8	21.4	32.2	21.9	24.5	23.2	53.5	52.7	53.1	0.13	4.19	3.58	9.88	495.3	295.2	394.4	11.8	200.1	48.4	-0.80716	-1.47916	-0.85169
F19	2.9	30	190.8	1	89	5.3	79.6	4.1	60.4	61.4	60.7	61.05	33.1	29.7	31.4	30.4	31	30.7	110.7	96.6	21.7	45.3	38.2	36.4	37.3	66.1	71.2	68.65	0.77	5.28	4.97	9.79	624.4	365.4	478.8	14.4	259	40.2	0.76062	0.35902	-0.48636
F20	3.1	32	173.4	3	92	17.7	70.6	3.7	55.8	52.9	55.1	54	37.3	35.9	36.6	34.5	30.7	32.6	121.5	99.7	31.4	46.3	22.1	19.1	20.6	89.5	85.8	87.65	0.52	5.22	4.3	10.16	836.8	434.3	626.4	18.8	402.5	50.8	0.34047	-0.18087	1.3266
F21	2.96	26	173	1	71.4	7.7	60.2	3.2	45.8	46.1	52.7	49.4	27.3	32	29.65	28.1	27.2	27.65	90.4	78.9	18	42.6	31.2	33.8	32.5	88.1	78.6	83.35	0.57	4.65	3.13	6.66	473.1	320.5	403.4	12.1	152.6	42.4	-0.10139	-2.09946	-1.13101
F22	4.62	25	187.7	1	108.6	21.7	82.7	4.2	65	68.6	63.7	66.15	36.3	33.5	34.9	35.2	33.5	34.35	125.2	101.6	30.8	40.2	37.5	35.3	36.4	85.2	76.1	80.65	0.75	6.09	4.72	9	790.3	408.6	595.9	17.9	381.8	41	1.4744	0.52732	0.38332
F23	4.95	20	175	2	85.1	6.3	74.9	3.9	59.2	47.6	47	47.3	38.2	39.3	38.75	30.3	28.6	29.45	82.9	78.7	27.5	44.9	19.8	19.4	19.6	47.3	47.6	47.45	0.8	4.97	4.35	10.03	571.4	354	471.9	14.2	217.4	41.5	-1.16896	-0.31728	-0.64925
F24	2.6	19	171.9	1	71.5	4.9	63.3	3.3	48.7	49.4	47.8	48.6	27.4	24.2	25.8	27.8	25.4	26.6	87.1	90	25.4	43.4	42.2	38.4	40.3	85.6	75.4	80.5	0.79	4.76	4.06	8.13	551.1	356.1	463.8	13.9	195	48.4	-0.22786	-1.00622	-0.26173
F25	3.97	33	186.5	3	112.4	17.8	90	4.6	72.9	77.4	77.7	77.55	60.9	64.4	62.65	54.3	51.3	52.8	166.6	141.8	32.2	50	55.3	53.4	54.35	116.9	93.8	105.35	0.56	5.12	4.36	10.24	902.5	514.1	687.1	20.6	388.4	45.7	4.62281	-0.18004	1.75269
F26	3.89	29	176.4	2	74.8	7.6	63.9	3.3	48.6	55.3	54.4	54.85	36.6	30.6	33.6	21.7	25.3	23.5	103.7	74.9	25.3	36.5	31.2	28.3	29.75	51.9	55.2	53.55	1	5.44	4.54	9.83	815	385.5	569.1	17.1	449.4	56.6	-0.29878	0.10464	1.29435
F27	4.8	21	182.8	2	86.6	6.8	75.9	3.9	58.4	58.3	58.6	58.45	30.3	26.3	28.3	24.2	29.5	26.85	88.5	79.2	26.5	45.9	33.9	23.4	28.65	74.6	80.9	77.75	0.33	6.63	5.26	10.33	682.4	363.1	521.2	15.6	319.3	44.9	-0.1155	1.53969	-0.02
F28	5.23	24	179.1	3	83	11.2	68.3	3.5	52	56.3	50.9	53.6	31.7	32.3	32	29	32.7	30.85	83.9	76.8	26.1	38	26.4	29	27.7	63	64.5	63.75	0.58	4.84	4.84	11.09	747.5	419.2	597.2	17.9	328.3	53.5	-0.33829	0.18775	1.11234
F29	3.48	20	173.8	2	65.6	4.1	58.4	3.1	44.1	43	46	44.5	27	24.1	25.55	20	21.9	20.95	67.7	49.1	20.2	34.2	23.5	22.3	22.9	75.4	65.5	70.45	0.56	4.13	4.03	9.31	517.5	197.9	344.9	10.3	319.5	39.3	-1.44149	-1.23255	-2.01845
F30	4.93	27	178.8	2	79.2	6.1	69.5	3.6	53	77	77	77	38.9	32.1	35.5	24.8	31.9	28.35	94.7	67	26.8	36.7	37.3	34.5	35.9	76.4	70.8	73.6	0.3	5.41	5.12	14.28	889.1	380.5	608.3	18.2	508.5	57.1	1.325	1.30707	1.52705
F31	5.18	36	183.7	1	98.7	13.1	81.4	4.2	64	67.6	61	64.3	36.4	31.6	34	30.6	32.7	31.65	108.8	91.2	30.6	41.3	38.4	31.8	35.1	51.9	64.6	58.25	0.25	6.84	5.54	10.55	839.5	388.7	608.5	18.3	450.8	46	0.64151	1.94322	0.72143
F32	5.7	35	185.7	3	98.8	12.5	82.1	4.2	64	66.1	51.6	58.85	46.6	44.8	45.7	31.1	36.1	33.6	89.8	62.6	31.7	44.8	21.5	25.6	23.55	76.9	47.4	62.15	0.5	5.37	4.6	10.52	966	444.4	712	21.4	521.6	53.7	-0.01318	0.22488	1.98861
F33	3.71	31	185.3	2	79.4	4.7	71	3.7	53.4	58.9	52.6	55.75	32.2	30.7	31.45	29.3	29	29.15	83.1	70.4	23.9	37.2	34.1	35.5	34.8	79.5	58.9	69.2	0.8	5.18	4.68	8.89	637.8	369.2	511.7	15.4	241.7	48	0.00472	-0.09595	0.07661
F34	3.9	32	187.2	2	88.3	7.2	77.1	4	58.9	57	52.4	54.7	34.2	34.3	34.25	32.4	33.9	33.15	108.4	72.6	24.2	39.2	38.6	37.1	37.85	82.4	73.2	77.8	0.56	4.66	4.09	10.22	688.6	367.8	504.3	15.1	320.8	42.7	0.65903	-0.69921	-0.108
F35	3.35	29	187.5	1	74.7	3	68.2	3.5	51.8	57.6	54.4	56	32.9	32.4	32.65	22.5	26.8	24.65	94.5	81.4	25.1	34.7	28.1	29.5	28.8	45.9	42.2	44.05	0.69	5.83	5.1	11.44	605.1	368	502.6	15.1	237.2	50.2	-0.45814	1.08578	0.10434
F36	4.33	24	178.2	2	84.7	8.3	72.6	3.8	56.3	52.3	53.7	53	45.9	42.3	44.1	39.7	40.4	40.05	78.9	112.9	33.7	57	33.8	32.8	33.3	80	72.3	76.15	0.78	6.36	5.4	8.45	703.3	401.9	558.8	16.8	301.4	49.2	0.18498	1.17783	0.58215
F37	4.4	22	177.8	2	76.9	6.5	66.9	3.5	51	63.4	63.2	63.3	29.7	26.8	28.25	26.1	28.4	27.25	96.4	82	18.8	36.8	32.5	29.4	30.95	82.5	68.5	75.5	0.75	5.36	4.54	9.74	673.4	367.8	521.1	15.6	305.7	50.5	0.5533	0.03956	0.33852
F38	3.99	18	174	2	92.3	16.1	72.5	3.7	57.4	63.4	53.4	58.4	36.4	31.3	33.85	33.7	29.3	31.5	107.7	63.5	14.1	33.5	22.3	22.6	22.45	56.8	59.8	58.3	1	6.07	5.21	7.98	650.4	291.2	459.7	13.8	359.2	37.3	0.27846	0.75849	-1.09116
F39	4.89	35	175.3	2	84	7.4	72.8	3.8	57	59.3	50.3	54.8	35	33.6	34.3	27	20.3	23.65	87.9	80.9	20.2	40.6	34.1	28	31.05	76.8	72.5	74.65	0.67	4.45	4.21	8.23	669.8	454.5	574.1	17.2	215.3	51	-0.0774	-1.05833	0.9469
F40	3.2	31	170.6	3	67.9	3.8	60.9	3.2	46.8	57.7	51.1	54.4	34.5	30.9	32.7	24	26.1	25.05	85.2	66.1	15.2	36.3	20	22.6	21.3	72.3	61.6	66.95	0.33	4.1	4.07	9.77	494.4	325.6	423.2	12.7	168.8	46.5	-0.40878	-1.14192	-0.76885
F41	5.82	21	180.9	2	77.2	4.9	68.7	3.6	52.2	56.2	52.1	54.15	36.7	31.9	34.3	28.5	30.8	29.65	87.8	83	29.6	45.5	34	25.9	29.95	73.5	79.6	76.55	0.67	6.32	5.49	11.5	655	375.4	519.3	15.6	279.6	50.2	-0.14595	1.73125	0.31272
F42	4.52	31	179	2	68.7	2.5	62.9	3.3	47.9	57.9	56	56.95	31.9	30.3	31.1	23.9	22.5	23.2	86.8	63	22	31.3	34.1	28.2	31.15	63.7	58.7	61.2	0.33	4.42	4.1	7.18	483.9	323.2	393.8	11.8	160.7	42.7	-0.22538	-1.34277	-1.05943
F43	2.5	26	177.4	1	78.9	7.4	68	3.5	51.9	39.1	33.2	36.15	43.9	42.9	43.4	31.3	30.4	30.85	83.7	97.7	31.6	50.7	38.4	34.8	36.6	65.9	65.8	65.85	0.5	5.18	4.91	12.99	618.6	346.6	477.5	14.3	272	45.2	-0.91539	0.7734	-0.31514
F44	2.22	23	175	1	68	4.2	60.6	3.2	45.7	54.1	53	53.55	27.5	24.8	26.15	27.2	25.9	26.55	77.7	59.2	16.9	35.6	32.4	31.7	32.05	58.9	61.2	60.05	0.33	5.36	4.64	9.25	614.8	378	438	13.1	336.8	48	-0.47349	0.04283	0.06338
